# Supplementary material
Source: MDPI journal article supplement (https://www.mdpi.com/2304-6740/7/12/140)

# checkCIF/PLATON report

Structure factors have been supplied for datablock(s) \_33\_05\_032a

THIS REPORT IS FOR GUIDANCE ONLY. IF USED AS PART OF A REVIEW PROCEDURE FOR PUBLICATION, IT SHOULD NOT REPLACE THE EXPERTISE OF AN EXPERIENCED CRYSTALLOGRAPHIC REFEREE.

No syntax errors found.      CIF dictionary      Interpreting this report

## Datablock: \_33\_05\_032a

---

Bond precision:    C-C = 0.0078 Å                      Wavelength=0.71075

Cell:                      a=21.467(2)              b=23.846(3)              c=22.560(3)  
                            alpha=90              beta=90              gamma=90  
Temperature:              143 K

|                        | Calculated                                             | Reported                                               |
|------------------------|--------------------------------------------------------|--------------------------------------------------------|
| Volume                 | 11549(2)                                               | 11549(2)                                               |
| Space group            | P b c n                                                | P b c n                                                |
| Hall group             | -P 2n 2ab                                              | -P 2n 2ab                                              |
| Moiety formula         | C105 H105.39 Al2 N4 O4 P4<br>Rh2, C10, C6 H6, 2(C5 H8) | C105 H105.395 Al2 N4 O4 P4<br>Rh2, C6 H6, C10 H16, C10 |
| Sum formula            | C131 H127.39 Al2 N4 O4 P4<br>Rh2                       | C131 H127.39 Al2 N4 O4 P4<br>Rh2                       |
| Mr                     | 2205.42                                                | 2205.42                                                |
| Dx, g cm <sup>-3</sup> | 1.268                                                  | 1.268                                                  |
| Z                      | 4                                                      | 4                                                      |
| Mu (mm <sup>-1</sup> ) | 0.411                                                  | 0.411                                                  |
| F000                   | 4597.6                                                 | 4598.0                                                 |
| F000'                  | 4592.17                                                |                                                        |
| h,k,lmax               | 27,30,29                                               | 27,29,29                                               |
| Nref                   | 13249                                                  | 13125                                                  |
| Tmin,Tmax              | 0.966,0.976                                            | 0.863,1.000                                            |
| Tmin'                  | 0.925                                                  |                                                        |

Correction method= # Reported T Limits: Tmin=0.863 Tmax=1.000  
AbsCorr = MULTI-SCAN

Data completeness= 0.991                      Theta(max)= 27.486

R(reflections)= 0.0467( 11795)              wR2(reflections)= 0.1163( 13125)

S = 1.104                      Npar= 680

---

The following ALERTS were generated. Each ALERT has the format

**test-name\_ALERT\_alert-type\_alert-level.**

Click on the hyperlinks for more details of the test.

### Alert level B

PLAT910\_ALERT\_3\_B Missing # of FCF Reflection(s) Below Theta(Min). 20 Note

### Alert level C

ABSTY02\_ALERT\_1\_C An \_exptl\_absorpt\_correction\_type has been given without  
a literature citation. This should be contained in the  
\_exptl\_absorpt\_process\_details field.

Absorption correction given as Multi-scan

|                   |                                                  |       |             |
|-------------------|--------------------------------------------------|-------|-------------|
| PLAT094_ALERT_2_C | Ratio of Maximum / Minimum Residual Density .... | 2.32  | Report      |
| PLAT202_ALERT_3_C | Isotropic non-H Atoms in Anion/Solvent .....     | 5     | Check       |
|                   | C5 C6 C7 C8 C9                                   |       |             |
| PLAT220_ALERT_2_C | Non-Solvent Resd 1 C Ueq(max)/Ueq(min) Range     | 4.4   | Ratio       |
| PLAT222_ALERT_3_C | Non-Solv. Resd 1 H Uiso(max)/Uiso(min) Range     | 5.5   | Ratio       |
| PLAT241_ALERT_2_C | High 'MainMol' Ueq as Compared to Neighbors of   | C8    | Check       |
| PLAT242_ALERT_2_C | Low 'MainMol' Ueq as Compared to Neighbors of    | C01N  | Check       |
| PLAT243_ALERT_4_C | High 'Solvent' Ueq as Compared to Neighbors of   | C01X  | Check       |
| PLAT260_ALERT_2_C | Large Average Ueq of Residue Including           | C1    | 0.181 Check |
| PLAT331_ALERT_2_C | Small Aver Phenyl C-C Dist C00Y -C01L_c          | 1.36  | Ang.        |
| PLAT360_ALERT_2_C | Short C(sp3)-C(sp3) Bond C7 - C7_b               | 1.37  | Ang.        |
| PLAT906_ALERT_3_C | Large K Value in the Analysis of Variance .....  | 5.030 | Check       |
| PLAT911_ALERT_3_C | Missing FCF Refl Between Thmin & STh/L= 0.600    | 25    | Report      |

### Alert level G

|                   |                                                  |        |       |
|-------------------|--------------------------------------------------|--------|-------|
| PLAT042_ALERT_1_G | Calc. and Reported MoietyFormula Strings Differ  | Please | Check |
| PLAT068_ALERT_1_G | Reported F000 Differs from Calcd (or Missing)... | Please | Check |
| PLAT083_ALERT_2_G | SHELXL Second Parameter in WGHT Unusually Large  | 15.02  | Why ? |
| PLAT230_ALERT_2_G | Hirshfeld Test Diff for C01M --C01S              | 13.0   | s.u.  |
| PLAT300_ALERT_4_G | Atom Site Occupancy of H20A Constrained at       | 0.5    | Check |
| PLAT300_ALERT_4_G | Atom Site Occupancy of H20B Constrained at       | 0.5    | Check |
| PLAT301_ALERT_3_G | Main Residue Disorder .....(Resd 1 )             | 5%     | Note  |
| PLAT304_ALERT_4_G | Non-Integer Number of Atoms in ..... Resd 1      | 226.39 | Check |
| PLAT343_ALERT_2_G | Unusual sp? Angle Range in Main Residue for      | C21    | Check |
| PLAT343_ALERT_2_G | Unusual sp? Angle Range in Main Residue for      | C22    | Check |
| PLAT343_ALERT_2_G | Unusual sp? Angle Range in Main Residue for      | C5     | Check |
| PLAT343_ALERT_2_G | Unusual sp? Angle Range in Main Residue for      | C6     | Check |
| PLAT343_ALERT_2_G | Unusual sp? Angle Range in Main Residue for      | C7     | Check |
| PLAT343_ALERT_2_G | Unusual sp? Angle Range in Main Residue for      | C8     | Check |
| PLAT343_ALERT_2_G | Unusual sp? Angle Range in Main Residue for      | C9     | Check |
| PLAT344_ALERT_2_G | Unusual sp? Angle Range in Solvent/Ion for       | C1     | Check |
| PLAT344_ALERT_2_G | Unusual sp? Angle Range in Solvent/Ion for       | C01V   | Check |
| PLAT344_ALERT_2_G | Unusual sp? Angle Range in Solvent/Ion for       | C01X   | Check |
| PLAT367_ALERT_2_G | Long? C(sp?)-C(sp?) Bond C00C - C20              | 1.53   | Ang.  |
| PLAT367_ALERT_2_G | Long? C(sp?)-C(sp?) Bond C00C - C21              | 1.54   | Ang.  |
| PLAT367_ALERT_2_G | Long? C(sp?)-C(sp?) Bond C00C - C22_a            | 1.54   | Ang.  |
| PLAT367_ALERT_2_G | Long? C(sp?)-C(sp?) Bond C00X - C01N             | 1.52   | Ang.  |
| PLAT367_ALERT_2_G | Long? C(sp?)-C(sp?) Bond C01A - C01M             | 1.50   | Ang.  |
| PLAT367_ALERT_2_G | Long? C(sp?)-C(sp?) Bond C5 - C6                 | 1.63   | Ang.  |
| PLAT367_ALERT_2_G | Long? C(sp?)-C(sp?) Bond C5 - C9_b               | 1.72   | Ang.  |
| PLAT367_ALERT_2_G | Long? C(sp?)-C(sp?) Bond C6 - C7                 | 1.67   | Ang.  |
| PLAT367_ALERT_2_G | Long? C(sp?)-C(sp?) Bond C6 - C7_b               | 1.62   | Ang.  |
| PLAT367_ALERT_2_G | Long? C(sp?)-C(sp?) Bond C7 - C8                 | 1.60   | Ang.  |
| PLAT367_ALERT_2_G | Long? C(sp?)-C(sp?) Bond C8 - C9                 | 1.65   | Ang.  |
| PLAT367_ALERT_2_G | Long? C(sp?)-C(sp?) Bond C1 - C01V               | 1.70   | Ang.  |
| PLAT367_ALERT_2_G | Long? C(sp?)-C(sp?) Bond C01T - C01X             | 1.72   | Ang.  |

|                                                                    |        |         |             |
|--------------------------------------------------------------------|--------|---------|-------------|
| PLAT432_ALERT_2_G Short Inter X...Y Contact                        | C8     | ..C2    | 2.48 Ang.   |
|                                                                    |        | x,y,z = | 1_555 Check |
| PLAT432_ALERT_2_G Short Inter X...Y Contact                        | C9     | ..C2    | 2.63 Ang.   |
|                                                                    |        | x,y,z = | 1_555 Check |
| PLAT720_ALERT_4_G Number of Unusual/Non-Standard Labels            | .....  |         | 116 Note    |
| PLAT773_ALERT_2_G Check long C-C Bond in CIF: C01T                 | --C01X |         | 1.72 Ang.   |
| PLAT773_ALERT_2_G Check long C-C Bond in CIF: C01V                 | --C1   |         | 1.70 Ang.   |
| PLAT773_ALERT_2_G Check long C-C Bond in CIF: C9                   | --C5   |         | 1.72 Ang.   |
| PLAT912_ALERT_4_G Missing # of FCF Reflections Above STh/L=        | 0.600  |         | 36 Note     |
| PLAT913_ALERT_3_G Missing # of Very Strong Reflections in FCF      | ....   |         | 2 Note      |
| PLAT933_ALERT_2_G Number of OMIT Records in Embedded .res File     | ...    |         | 1 Note      |
| PLAT978_ALERT_2_G Number C-C Bonds with Positive Residual Density. |        |         | 2 Info      |

---

0 **ALERT level A** = Most likely a serious problem - resolve or explain  
 1 **ALERT level B** = A potentially serious problem, consider carefully  
 13 **ALERT level C** = Check. Ensure it is not caused by an omission or oversight  
 41 **ALERT level G** = General information/check it is not something unexpected

3 ALERT type 1 CIF construction/syntax error, inconsistent or missing data  
 39 ALERT type 2 Indicator that the structure model may be wrong or deficient  
 7 ALERT type 3 Indicator that the structure quality may be low  
 6 ALERT type 4 Improvement, methodology, query or suggestion  
 0 ALERT type 5 Informative message, check

---

It is advisable to attempt to resolve as many as possible of the alerts in all categories. Often the minor alerts point to easily fixed oversights, errors and omissions in your CIF or refinement strategy, so attention to these fine details can be worthwhile. In order to resolve some of the more serious problems it may be necessary to carry out additional measurements or structure refinements. However, the purpose of your study may justify the reported deviations and the more serious of these should normally be commented upon in the discussion or experimental section of a paper or in the "special\_details" fields of the CIF. checkCIF was carefully designed to identify outliers and unusual parameters, but every test has its limitations and alerts that are not important in a particular case may appear. Conversely, the absence of alerts does not guarantee there are no aspects of the results needing attention. It is up to the individual to critically assess their own results and, if necessary, seek expert advice.

### Publication of your CIF in IUCr journals

A basic structural check has been run on your CIF. These basic checks will be run on all CIFs submitted for publication in IUCr journals (*Acta Crystallographica*, *Journal of Applied Crystallography*, *Journal of Synchrotron Radiation*); however, if you intend to submit to *Acta Crystallographica Section C* or *E* or *IUCrData*, you should make sure that full publication checks are run on the final version of your CIF prior to submission.

### Publication of your CIF in other journals

Please refer to the *Notes for Authors* of the relevant journal for any special instructions relating to CIF submission.

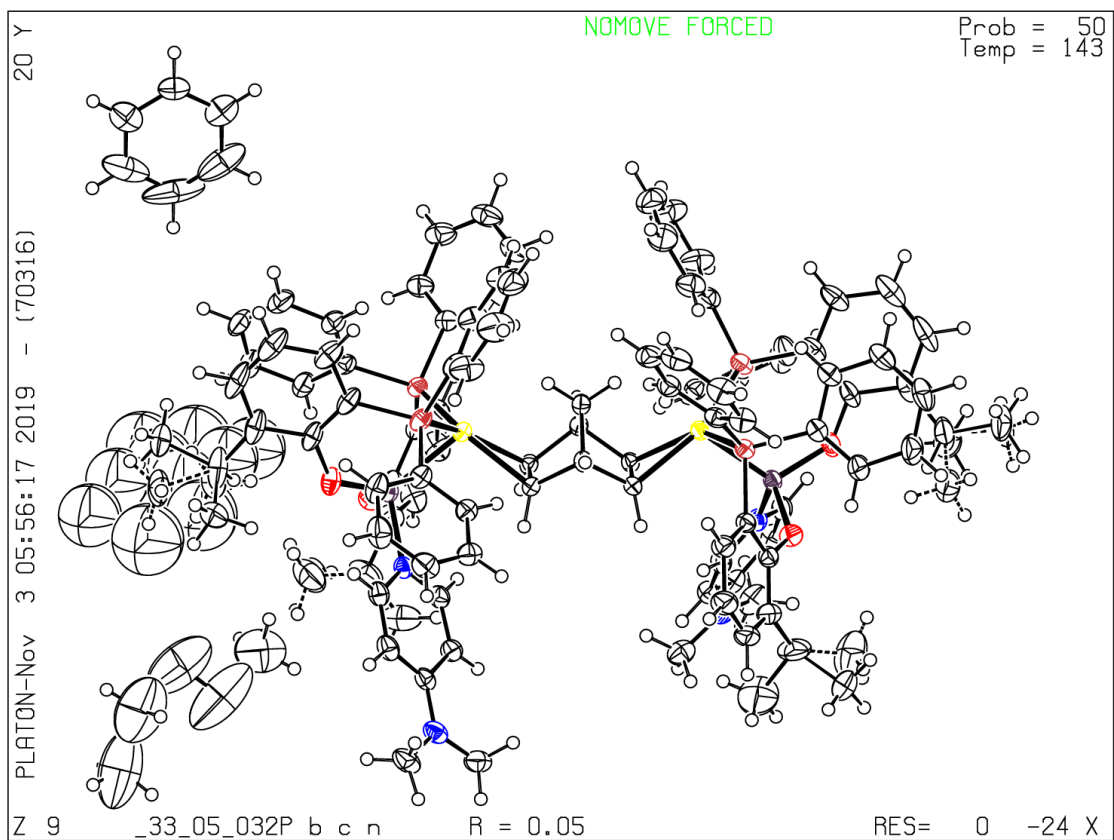

Supplement: s1 [file s1]
