# Supplementary material
Source: MDPI journal article supplement (https://www.mdpi.com/2304-6740/7/12/140)
Supplement: s1 [file s1]

# Supplementary Materials: A PAIP Pincer Ligand Bearing a 2-Diphenylphosphinophenoxy Backbone

Kazuhiko Semba, Ikuya Fujii and Yoshiaki Nakao

## 1. Reaction of 8 and norbornadiene

In a glove box, **8** (17 mg, 9.0  $\mu\text{mol}$ ) and norbornadiene (0.8 mg, 11  $\mu\text{mol}$ ) were placed together in a J-young NMR tube and dissolved in  $\text{C}_6\text{D}_6$  (500  $\mu\text{L}$ ) for 3 h at room temperature (Scheme S1). The resulting mixture was analyzed by NMR spectroscopies (Figure S1). **7** was formed quantitatively.

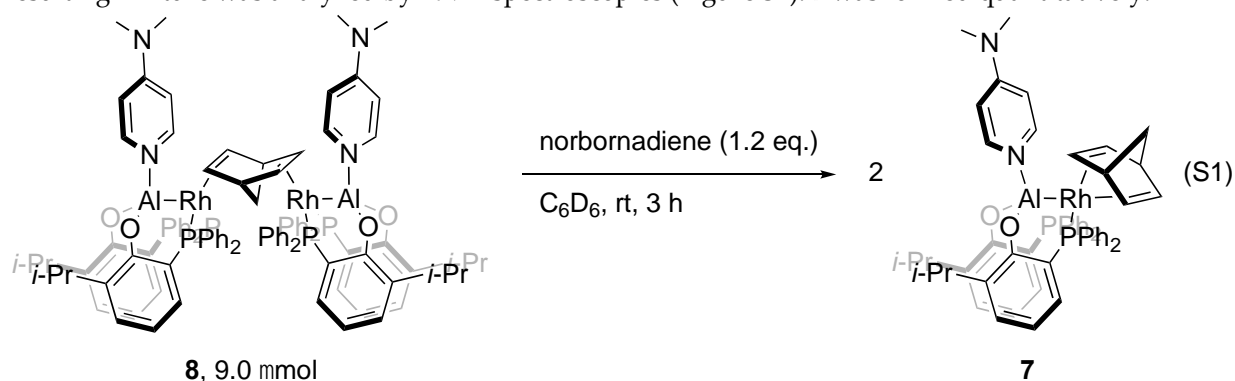

Scheme S1. Preparation of **7** from **8**.

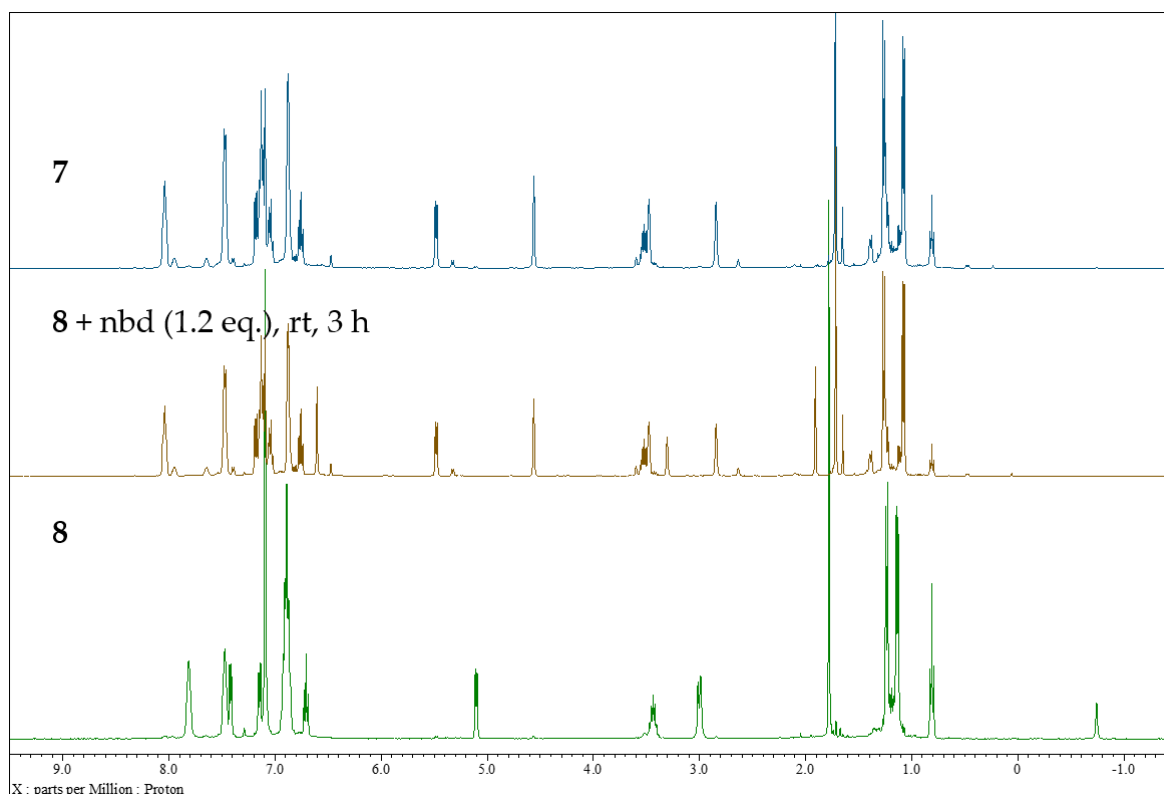

Figure S1.  $^1\text{H}$  NMR spectra of Scheme S1.

## 2. X-ray diffraction study and X-ray Crystallographic Analysis

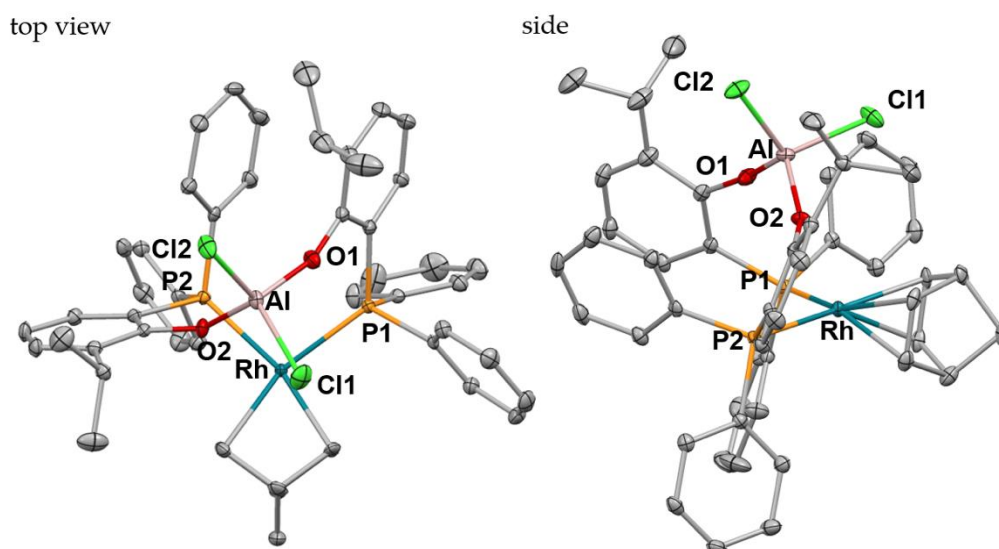

**Figure S2.** Crystal structure of **6** (atomic displacement parameters set at 30% probability; all hydrogen atoms are omitted for clarity). Selected bond lengths (Å) and angles (°): Complex **6**: Rh–P1 2.3441(9), Rh–P2 2.3666(9), Al–Cl1 2.1333(14), Al–Cl2 2.1534(14), Al–O1 1.719(3), Al–O2 1.723(2), P1–Rh–P2 99.72(3).

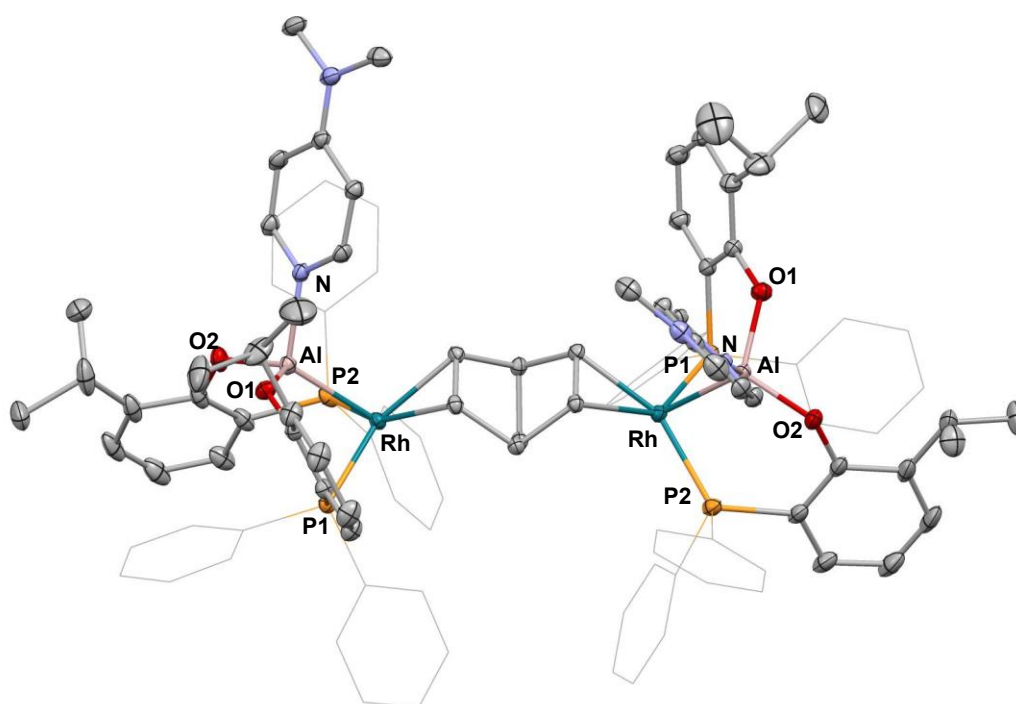

**Figure S3.** Crystal structure of **8** (atomic displacement parameters set at 30% probability; all hydrogen atoms and solvents are omitted for clarity). Selected bond lengths (Å) and angles (°): Complex **8**: Rh–Al 2.3183(8), Rh–P1 2.2821(8), Rh–P2 2.2570(9), Al–O1 1.753(2), Al–O2 1.753(2), Al–N 1.945(2), P1–Rh–P2 111.88(3).

Table S1. Crystallographic data of **6** and **8**.

| Compound                                            | <b>6</b>                                                                           | <b>8</b>                                                                                                          |
|-----------------------------------------------------|------------------------------------------------------------------------------------|-------------------------------------------------------------------------------------------------------------------|
| Empirical formula                                   | C <sub>49</sub> H <sub>48</sub> AlCl <sub>2</sub> O <sub>2</sub> P <sub>2</sub> Rh | C <sub>131</sub> H <sub>127.39</sub> Al <sub>2</sub> N <sub>4</sub> O <sub>4</sub> P <sub>4</sub> Rh <sub>2</sub> |
| Formula weight                                      | 931.66                                                                             | 2205.42                                                                                                           |
| Crystal system                                      | triclinic                                                                          | orthorhombic                                                                                                      |
| Space group                                         | <i>P</i> $\bar{1}$ (#2)                                                            | Pbcn (#60)                                                                                                        |
| <i>a</i> , Å                                        | 11.5108(13)                                                                        | 21.467(2)                                                                                                         |
| <i>b</i> , Å                                        | 11.7477(12)                                                                        | 23.846(3)                                                                                                         |
| <i>c</i> , Å                                        | 17.714(2)                                                                          | 22.560(3)                                                                                                         |
| $\alpha$ , deg.                                     | 77.954(5)                                                                          | 90                                                                                                                |
| $\beta$ , deg.                                      | 82.044(5)                                                                          | 90                                                                                                                |
| $\gamma$ , deg.                                     | 68.932(4)                                                                          | 90                                                                                                                |
| <i>V</i> , Å <sup>3</sup>                           | 2180.7(4)                                                                          | 11549(2)                                                                                                          |
| <i>Z</i>                                            | 2                                                                                  | 4                                                                                                                 |
| <i>D</i> <sub>calcd</sub> , g/cm <sup>−3</sup>      | 1.419                                                                              | 1.268                                                                                                             |
| $\mu$ (Mo-K $\alpha$ ), mm <sup>−1</sup>            | 0.646                                                                              | 0.411                                                                                                             |
| <i>T</i> , K                                        | 143                                                                                | 143                                                                                                               |
| Crystal size, mm                                    | 0.180 × 0.140 × 0.100                                                              | 0.190 × 0.070 × 0.060                                                                                             |
| $\theta$ range for data collection (deg.)           | 2.24 to 25.03                                                                      | 3.11 to 27.49                                                                                                     |
| no. of reflections measured                         | 14942                                                                              | 90312                                                                                                             |
| Unique data                                         | 7551                                                                               | 13125                                                                                                             |
| Data / restraints / parameters                      | 7551 / 0 / 514                                                                     | 13125 / 0 / 680                                                                                                   |
| <i>R</i> 1 ( <i>I</i> > 2.0 $\sigma$ ( <i>I</i> ))  | 0.0400                                                                             | 0.0467                                                                                                            |
| <i>wR</i> 2 ( <i>I</i> > 2.0 $\sigma$ ( <i>I</i> )) | 0.1079                                                                             | 0.1120                                                                                                            |
| <i>R</i> 1 (all data)                               | 0.0490                                                                             | 0.0530                                                                                                            |
| <i>wR</i> 2 (all data)                              | 0.1291                                                                             | 0.1163                                                                                                            |
| GOF on <i>F</i> <sup>2</sup>                        | 1.166                                                                              | 1.104                                                                                                             |

(a)  $R1 = (\sum ||F_o| - |F_c||) / (\sum |F_o|)$  b)  $wR2 = [\{\sum w(F_o^2 - F_c^2)^2\} / \{\sum w(F_o^2)^2\}]^{1/2}$

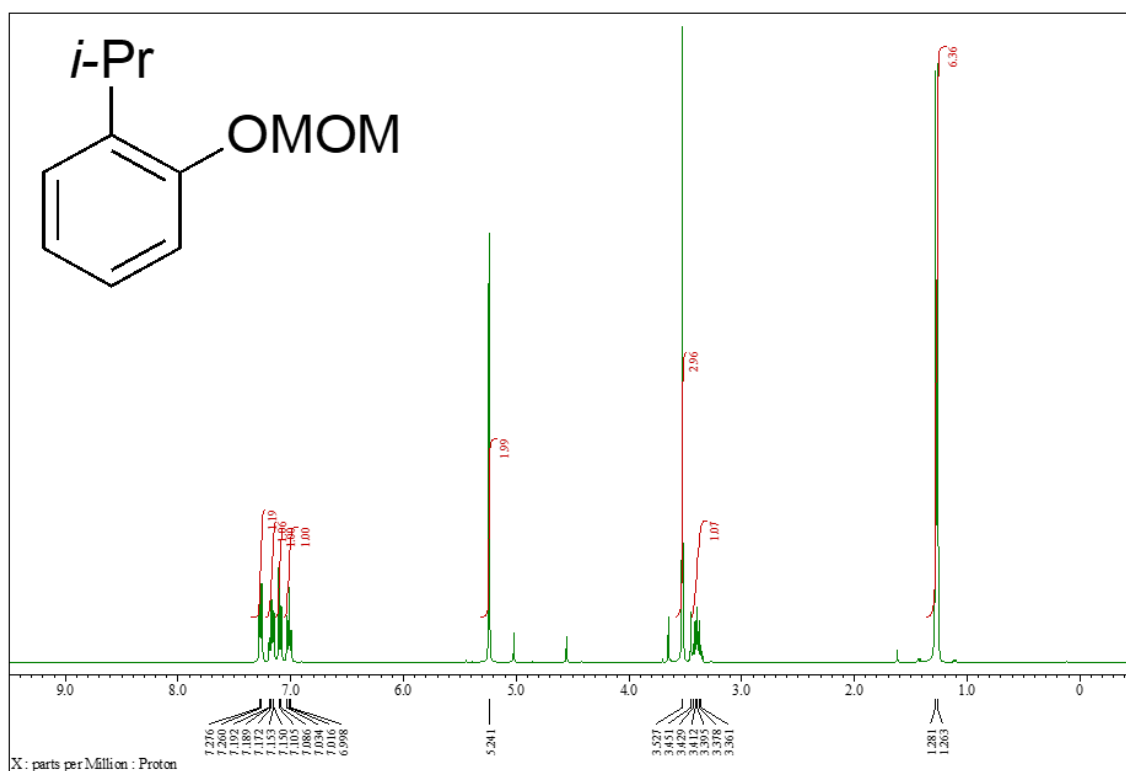Figure S4. A <sup>1</sup>H NMR spectrum of 4.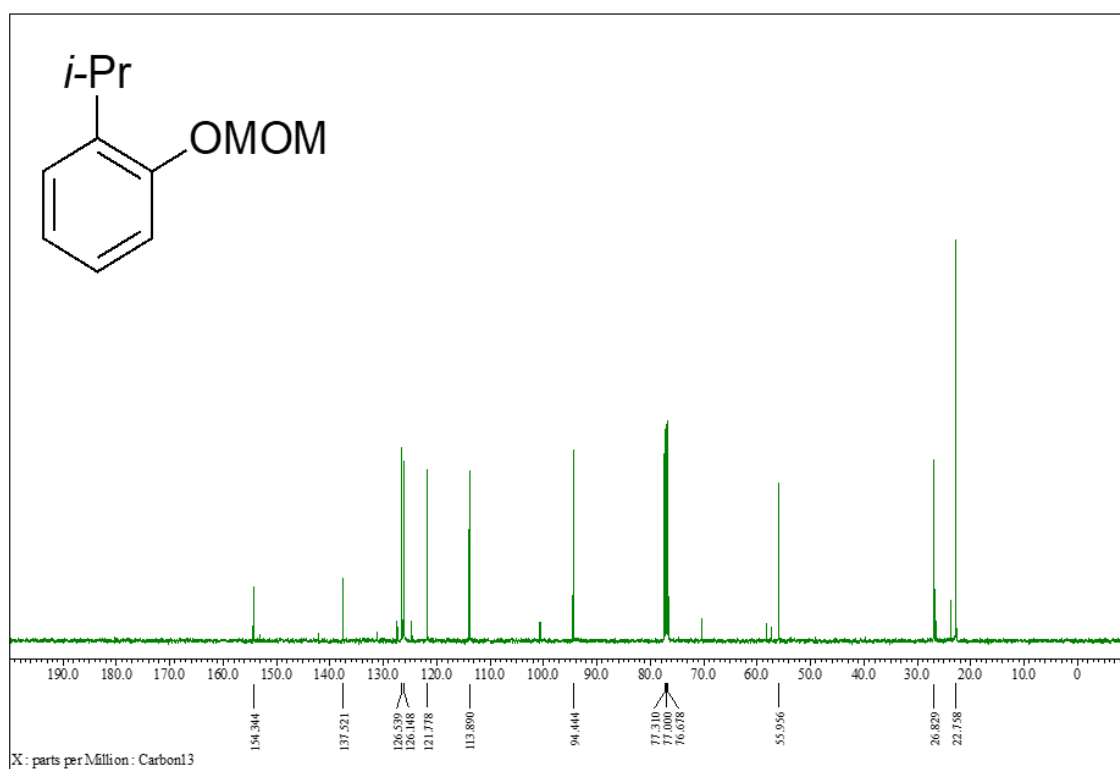Figure S5. A <sup>13</sup>C NMR spectrum of 4.

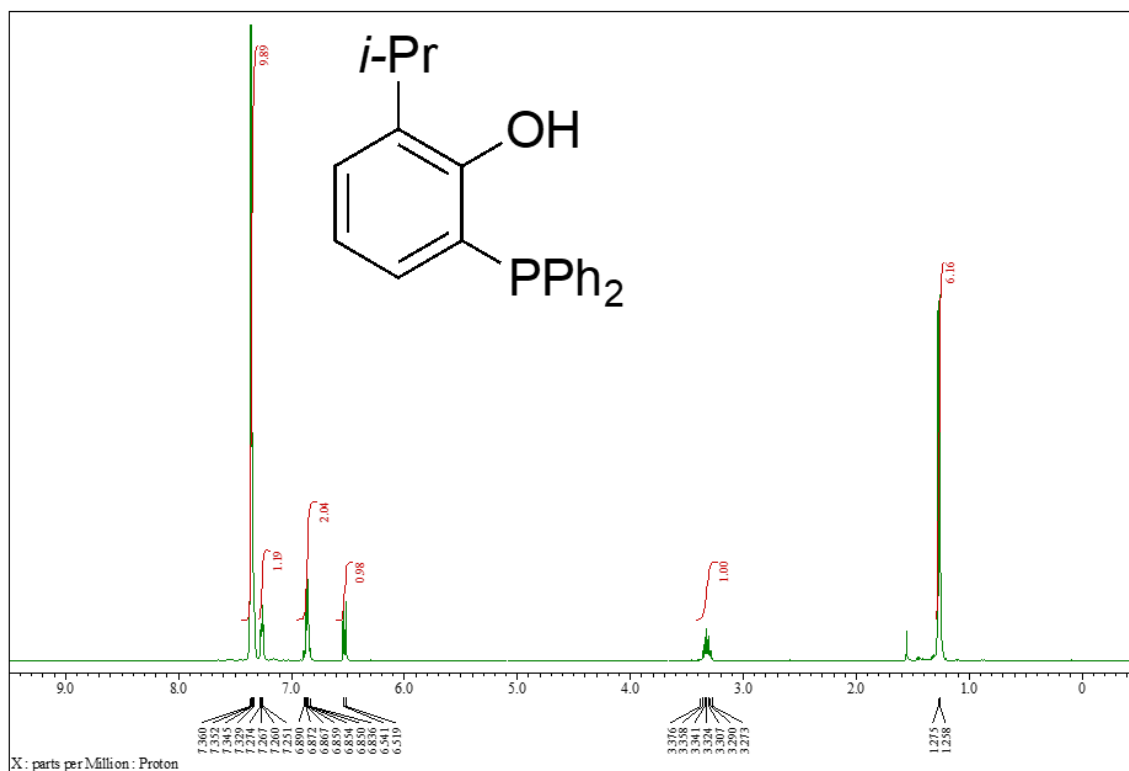Figure S6. A  $^1\text{H}$  NMR spectrum of 5.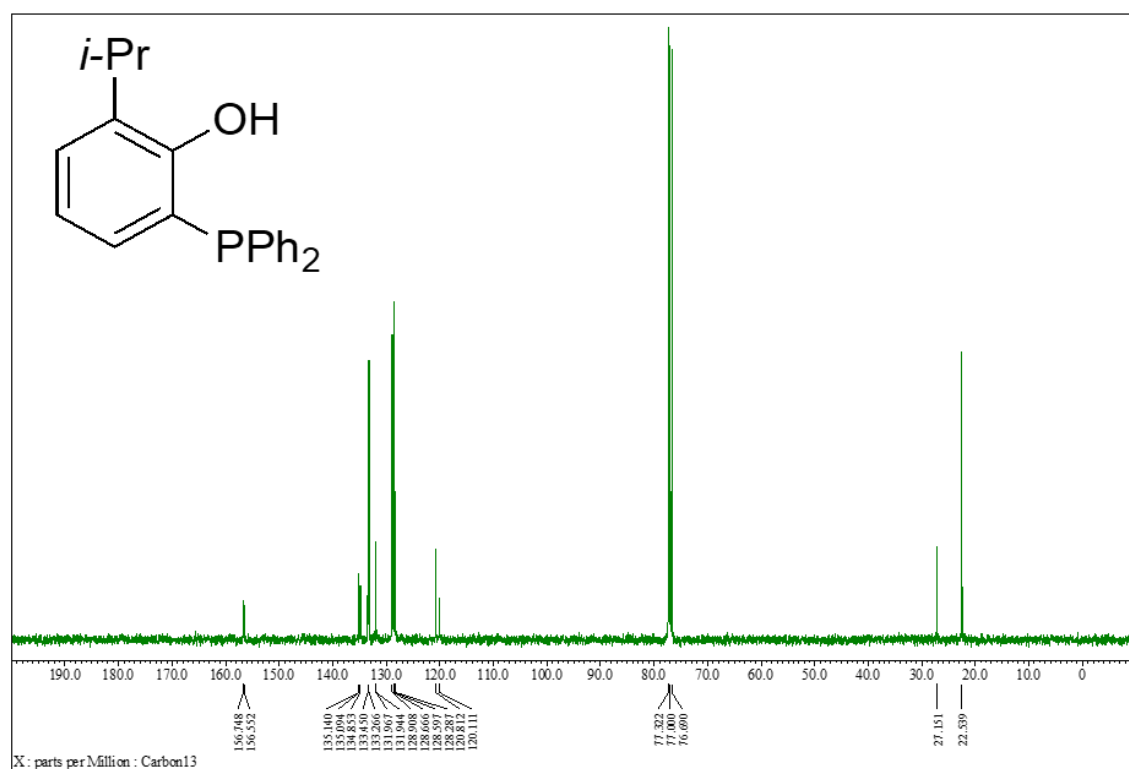Figure S7. A  $^{13}\text{C}$  NMR spectrum of 5.

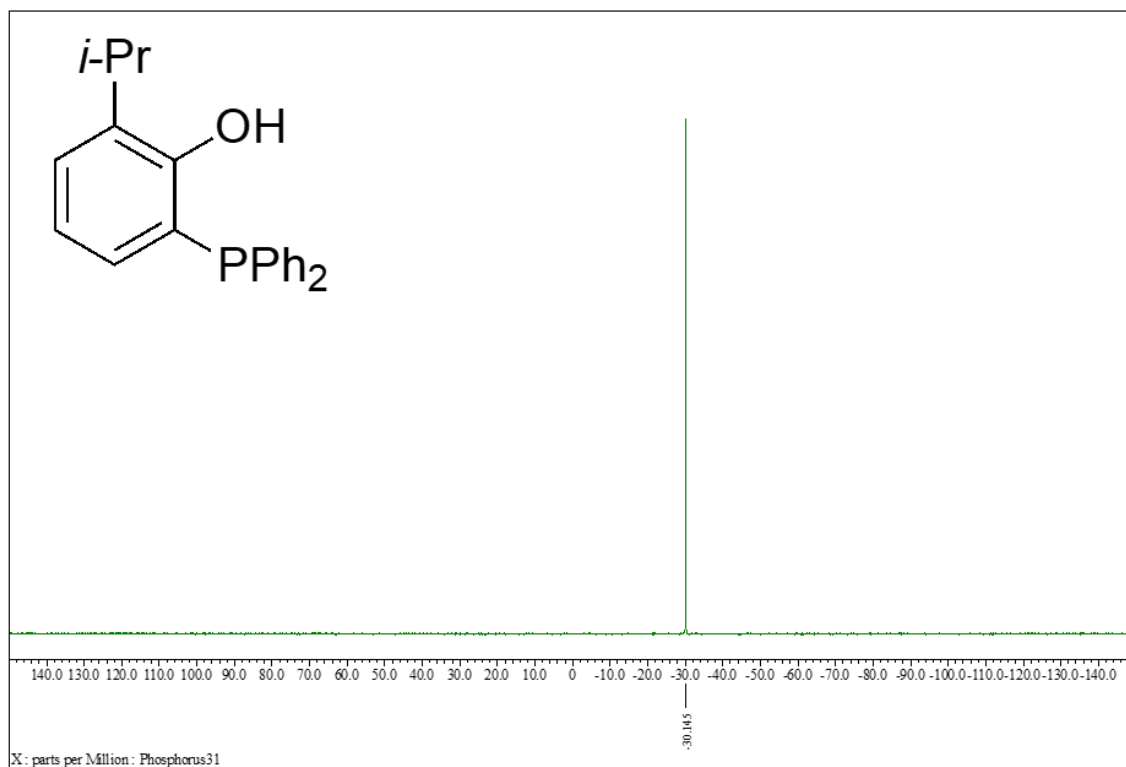Figure S8. A  $^{31}\text{P}$  NMR spectrum of 5.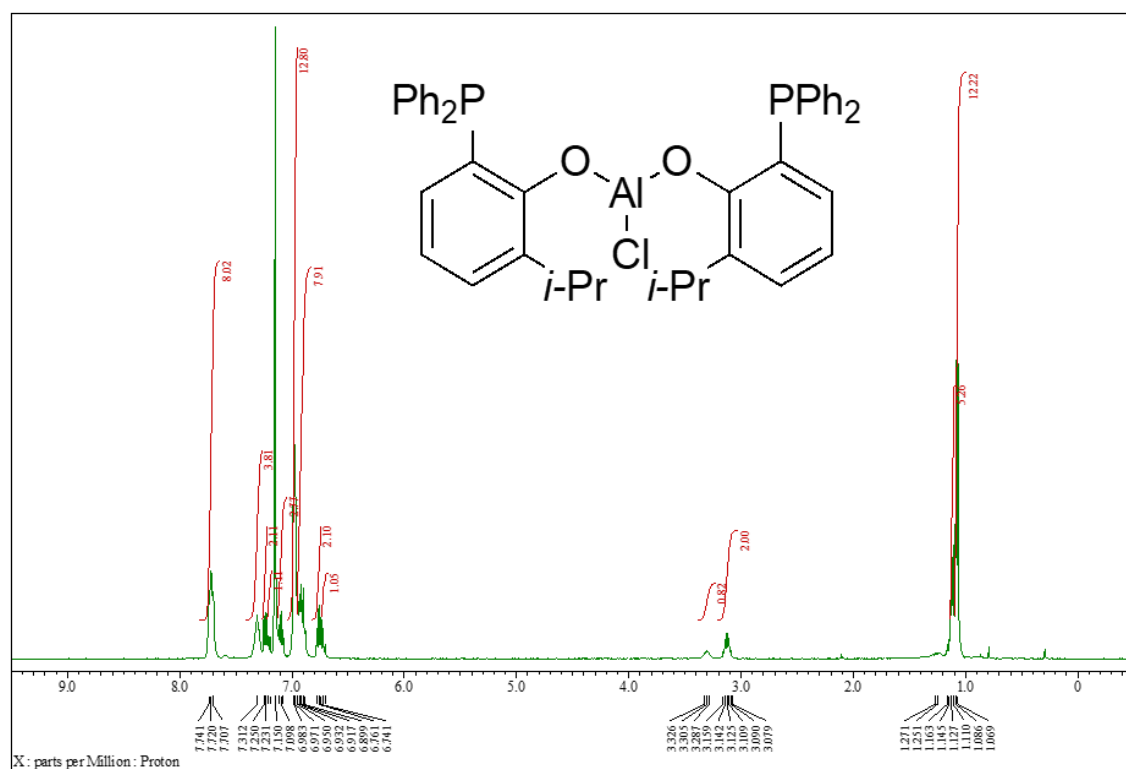Figure S9. A  $^1\text{H}$  NMR spectrum of 2.

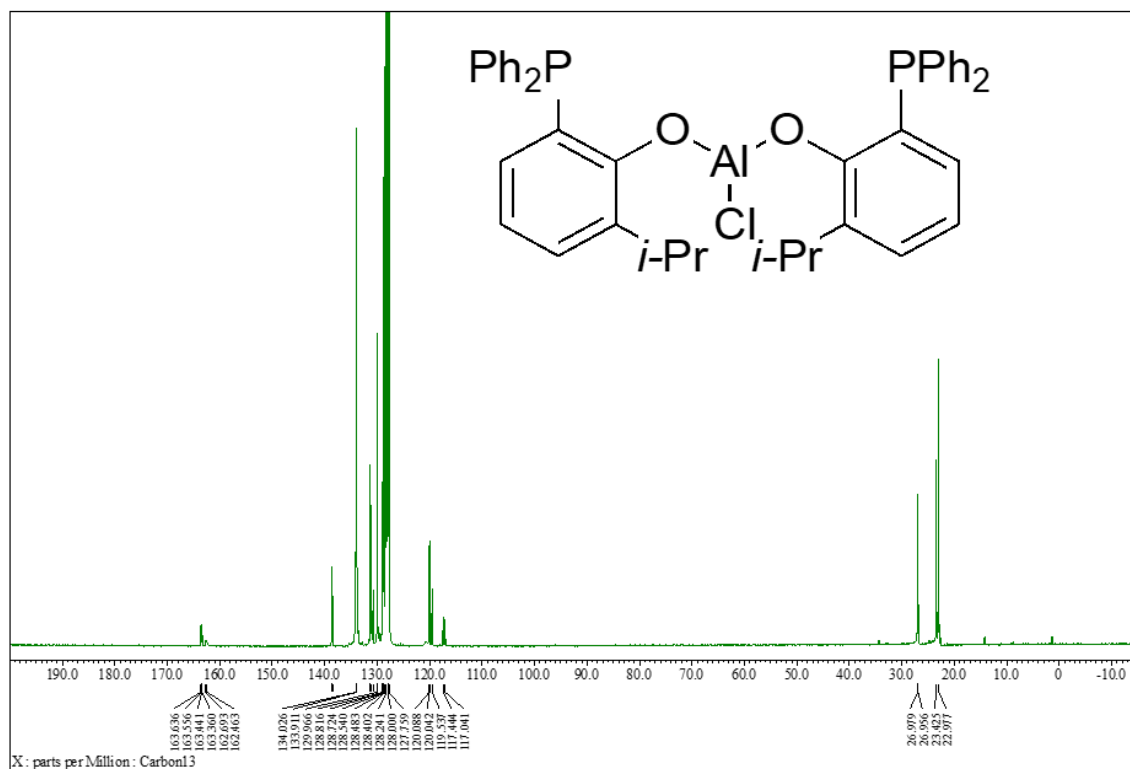Figure S10. A  $^{13}\text{C}$  NMR spectrum of **2**.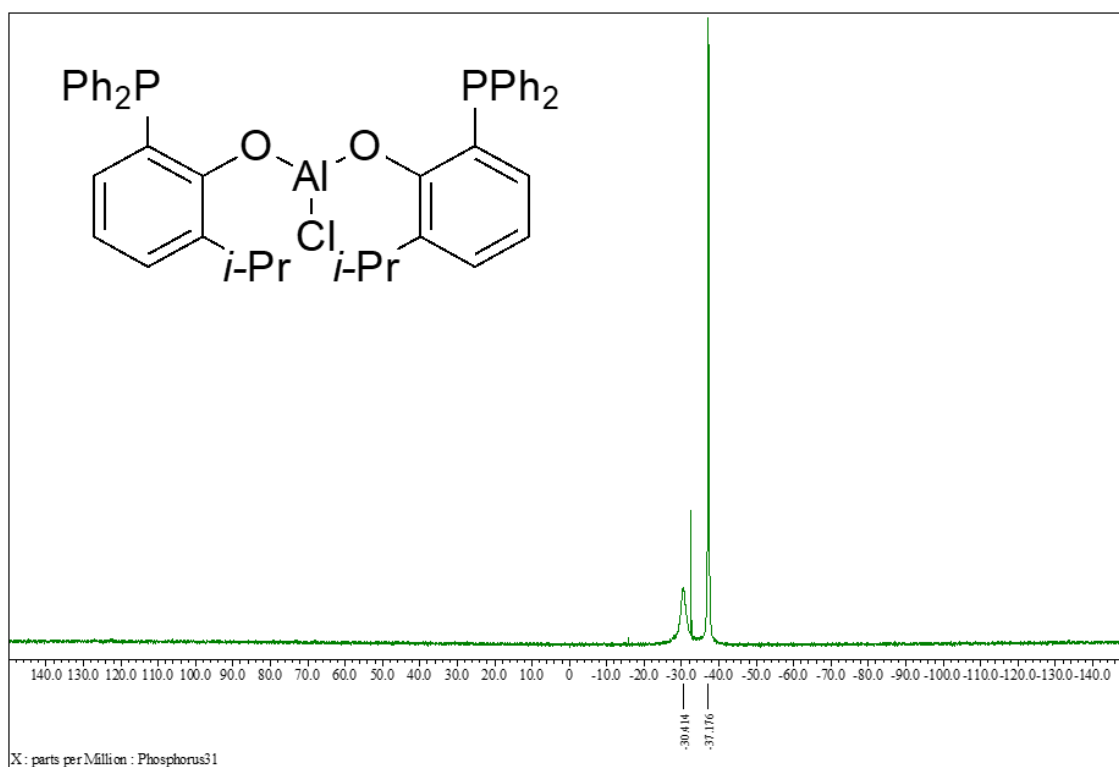Figure S11. A  $^{31}\text{P}$  NMR spectrum of **2**.

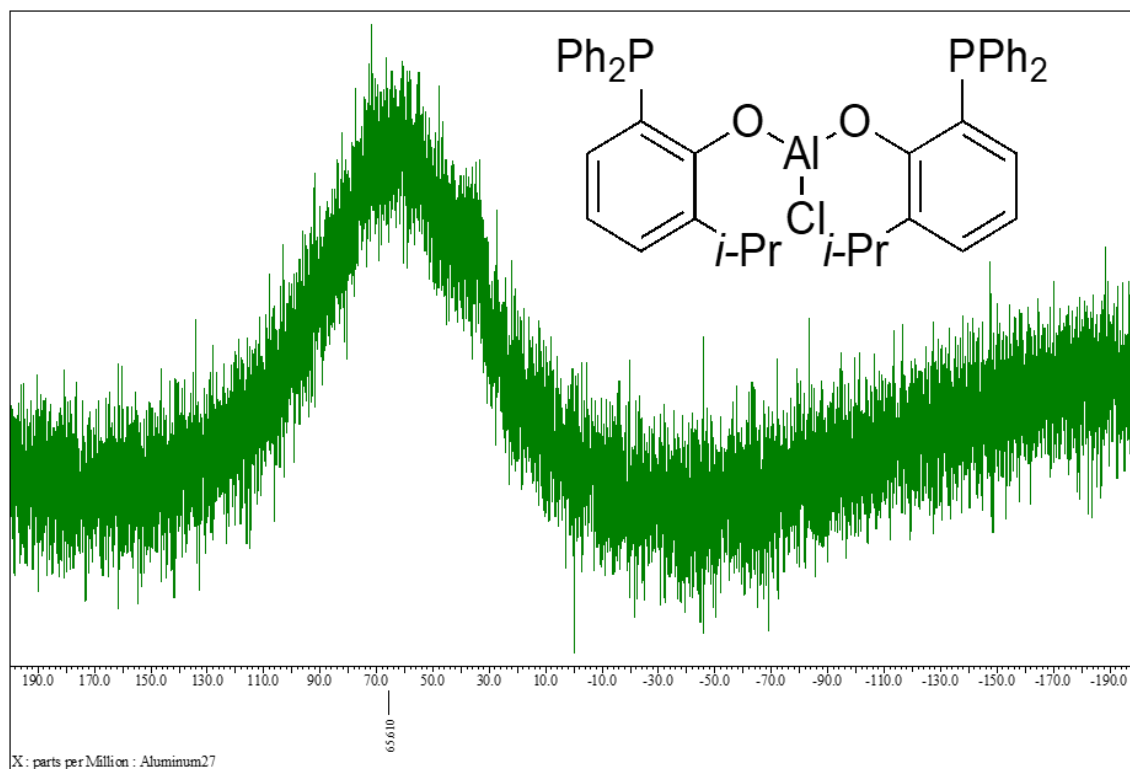Figure S12. A <sup>27</sup>Al NMR spectrum of 2.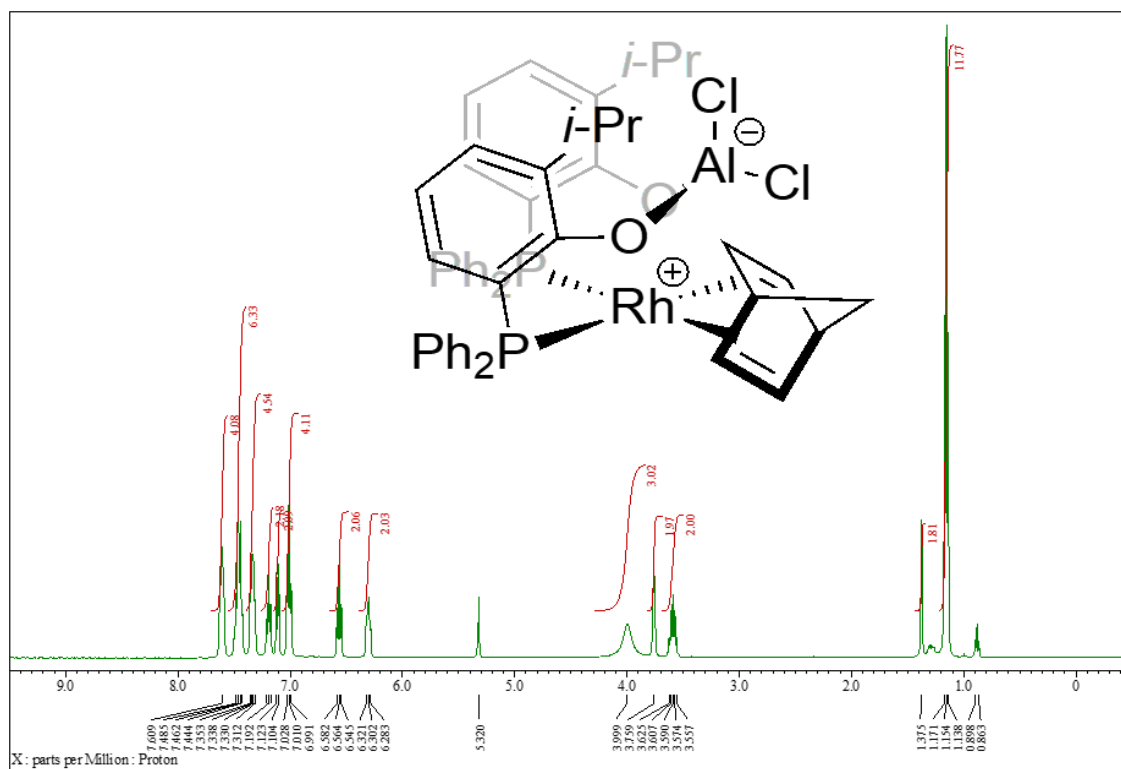Figure S13. A <sup>1</sup>H NMR spectrum of 6.



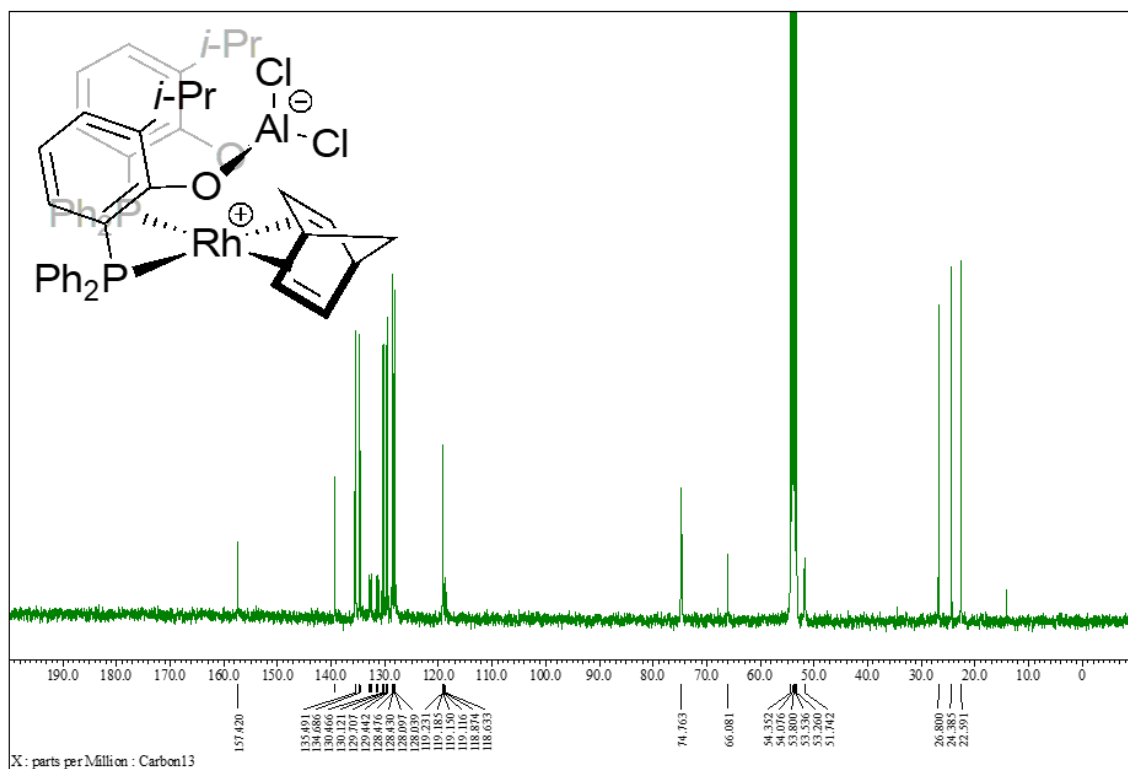

**Figure S14.** A  $^{13}\text{C}$  NMR spectrum of **6**.

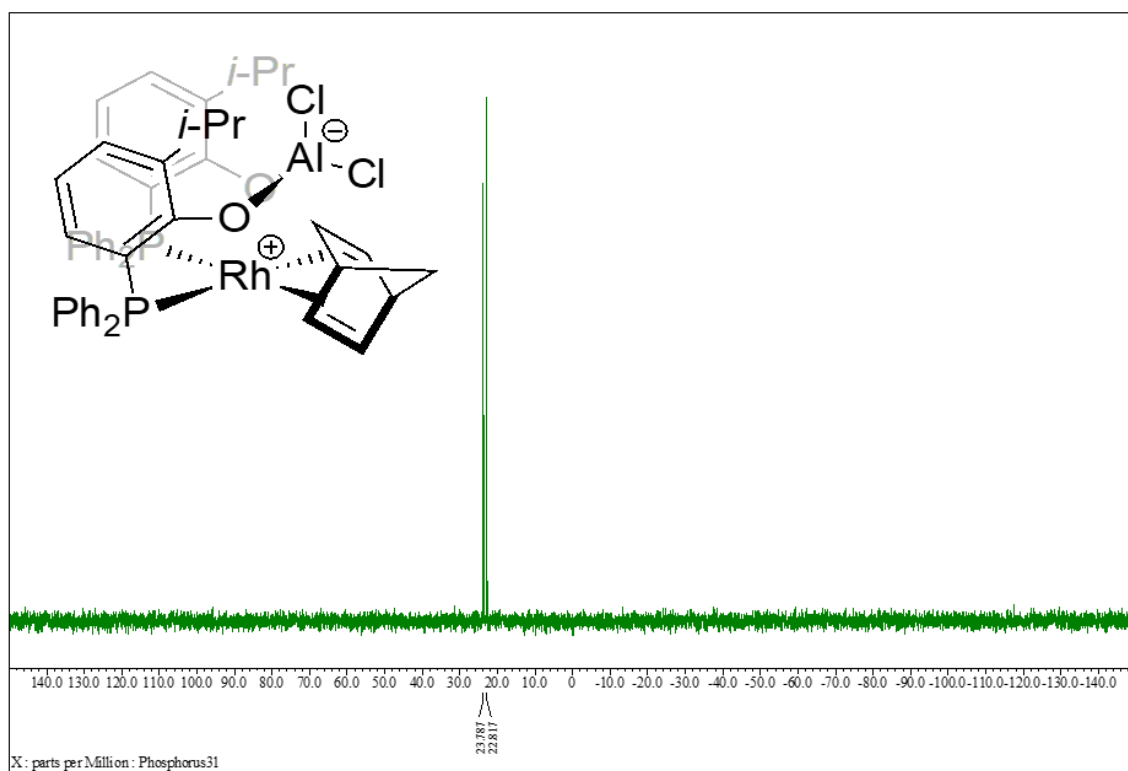

**Figure S15.** A  $^{31}\text{P}$  NMR spectrum of **6**.

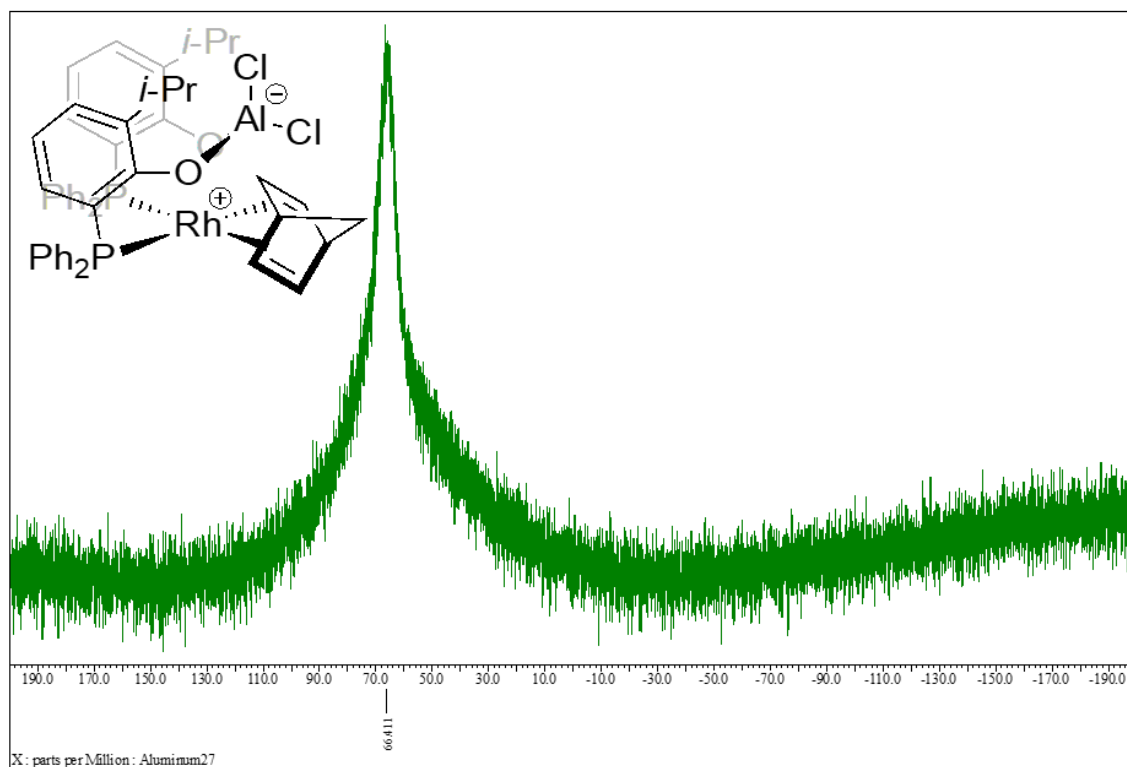Figure S16. A  $^{27}\text{Al}$  NMR spectrum of 6.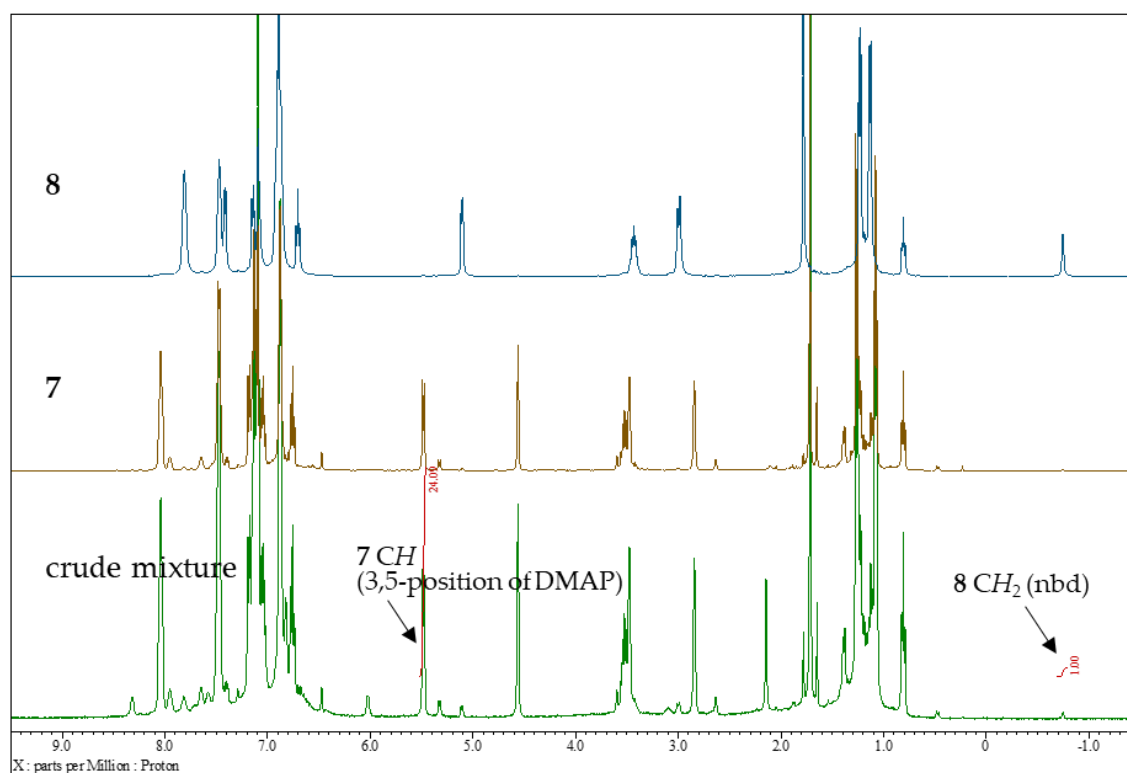Figure S17.  $^1\text{H}$  NMR spectra of Scheme 4.

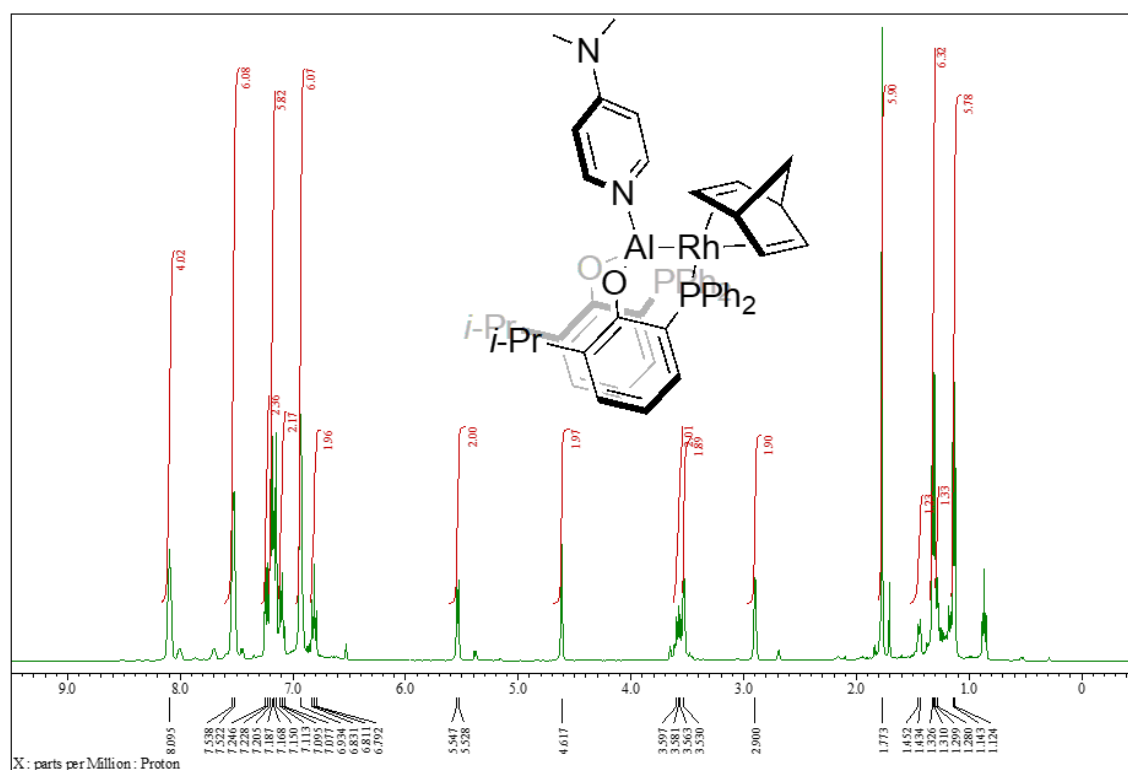Figure S18. A <sup>1</sup>H NMR spectrum of 7.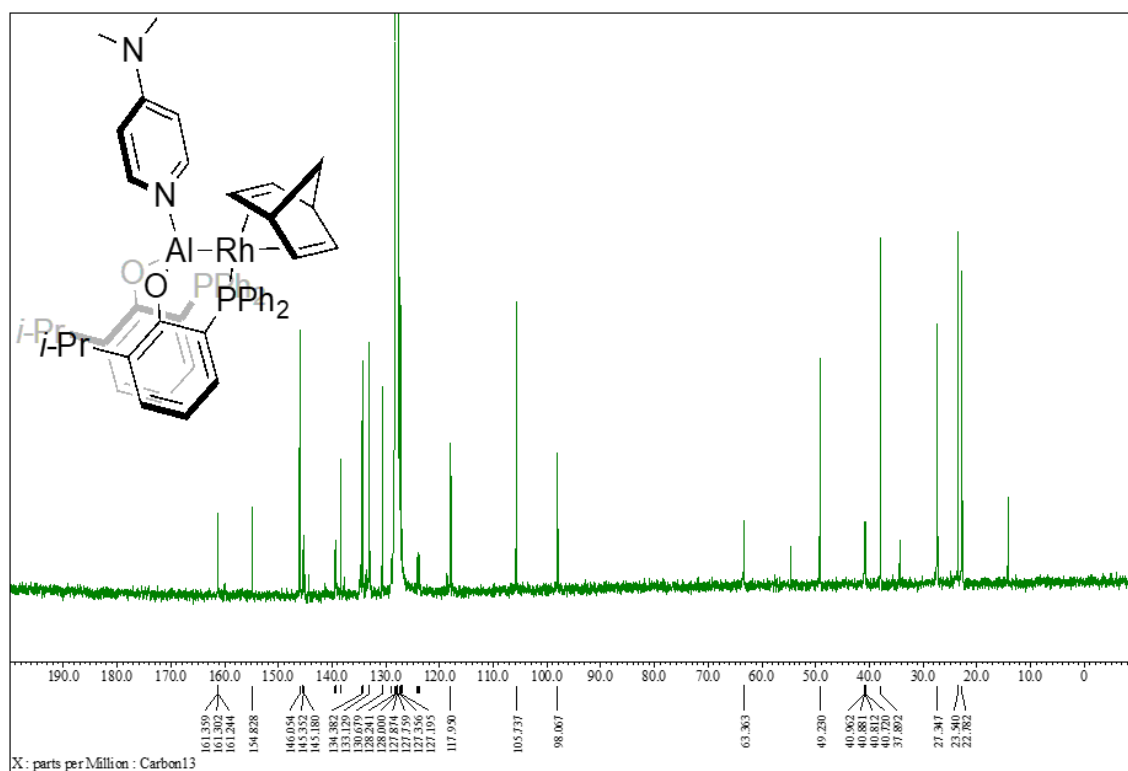Figure S19. A <sup>13</sup>C NMR spectrum of 7.

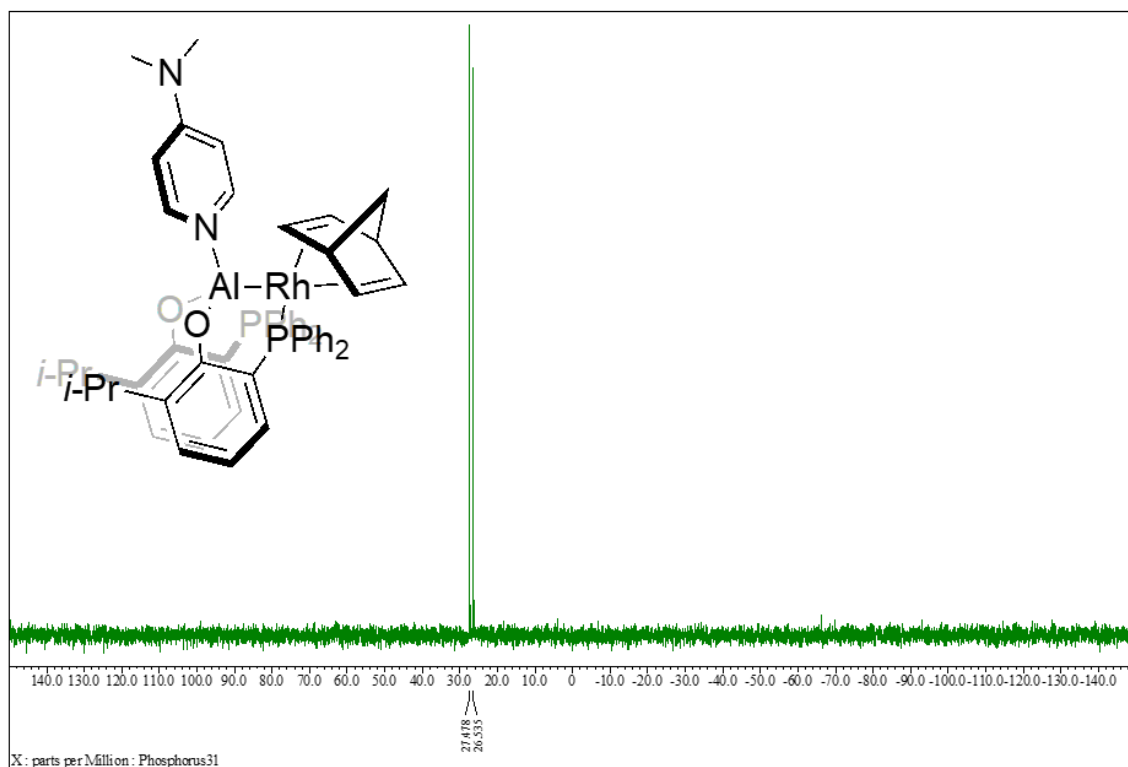Figure S20. A  $^{31}\text{P}$  NMR spectrum of 7.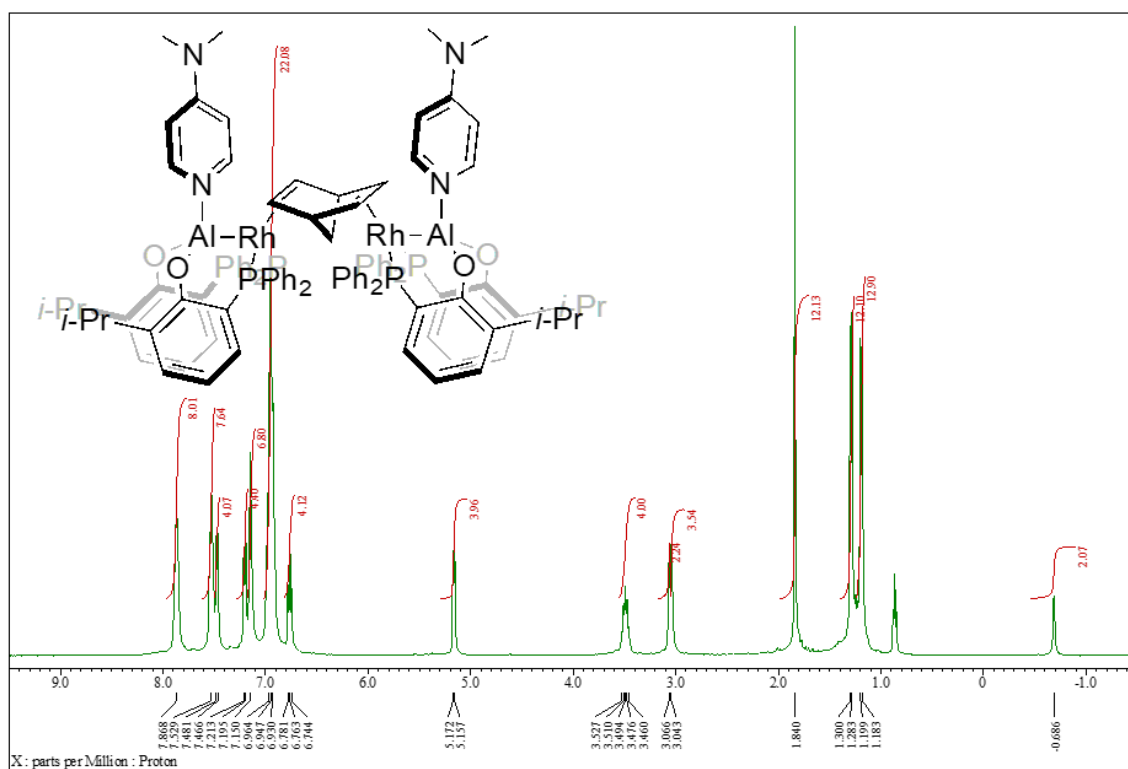Figure S21. A  $^1\text{H}$  NMR spectrum of 8.

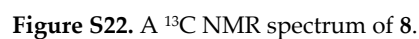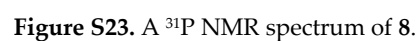

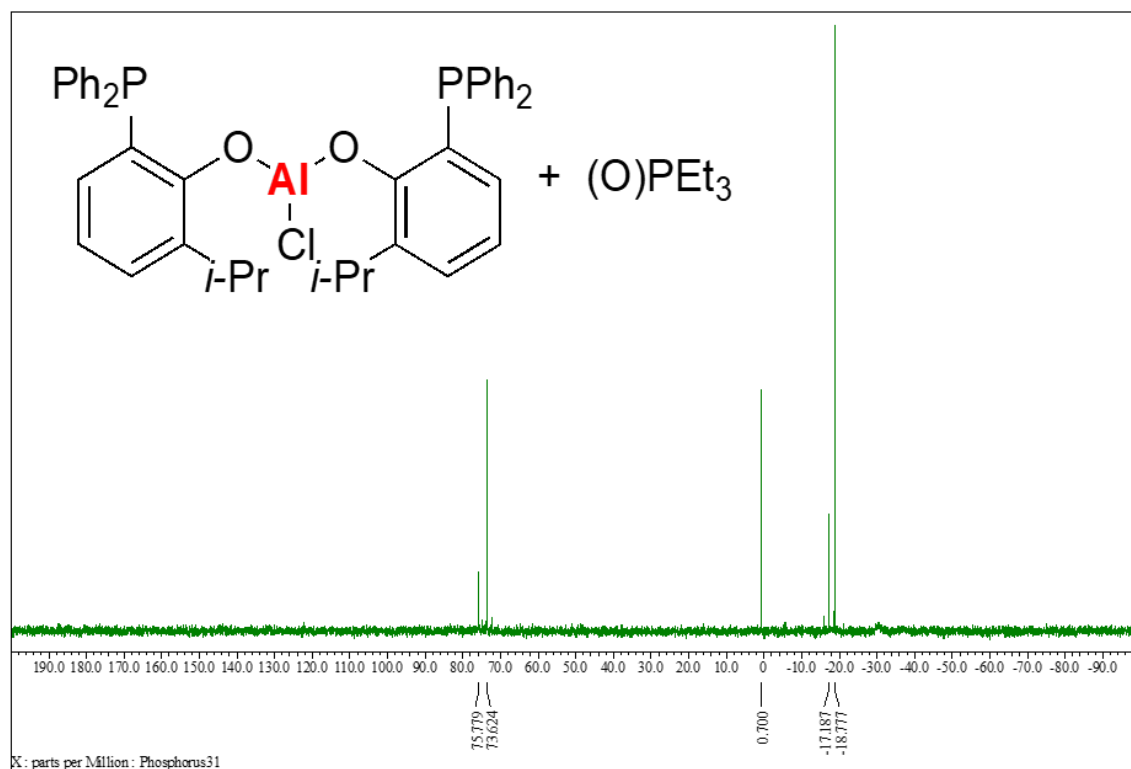Figure S24. A <sup>31</sup>P NMR spectrum of Scheme 2.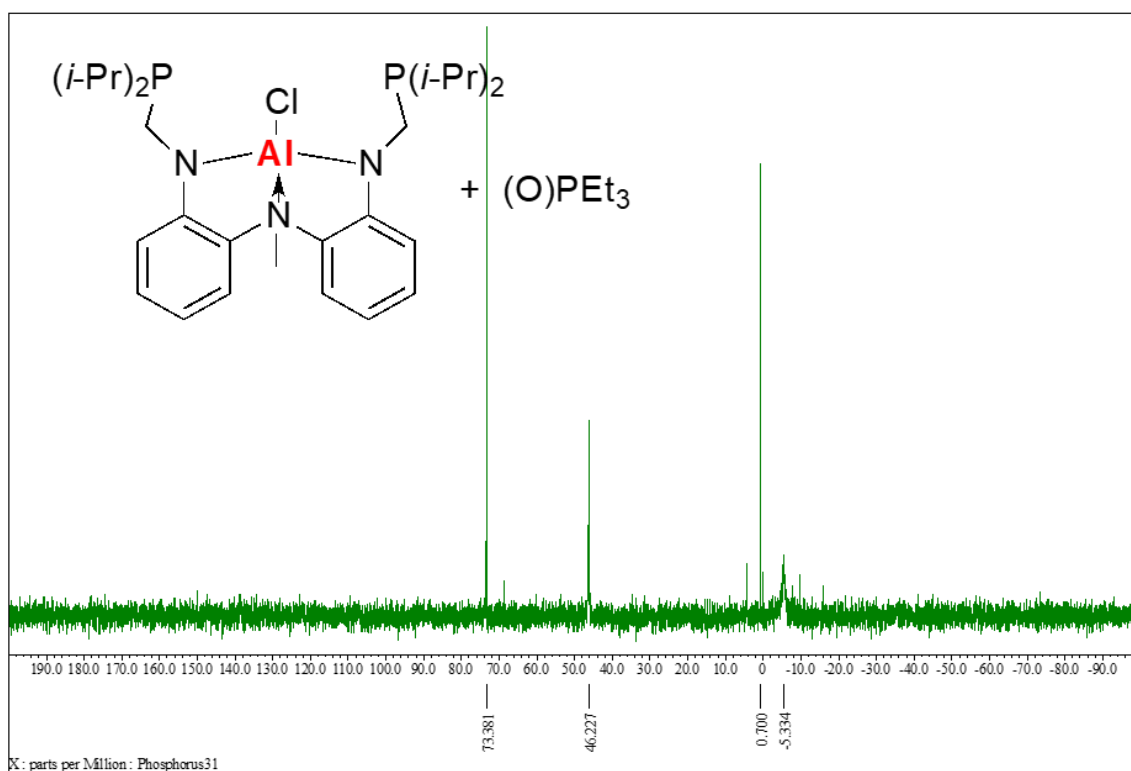Figure S25. A <sup>31</sup>P NMR spectrum of Scheme 2.

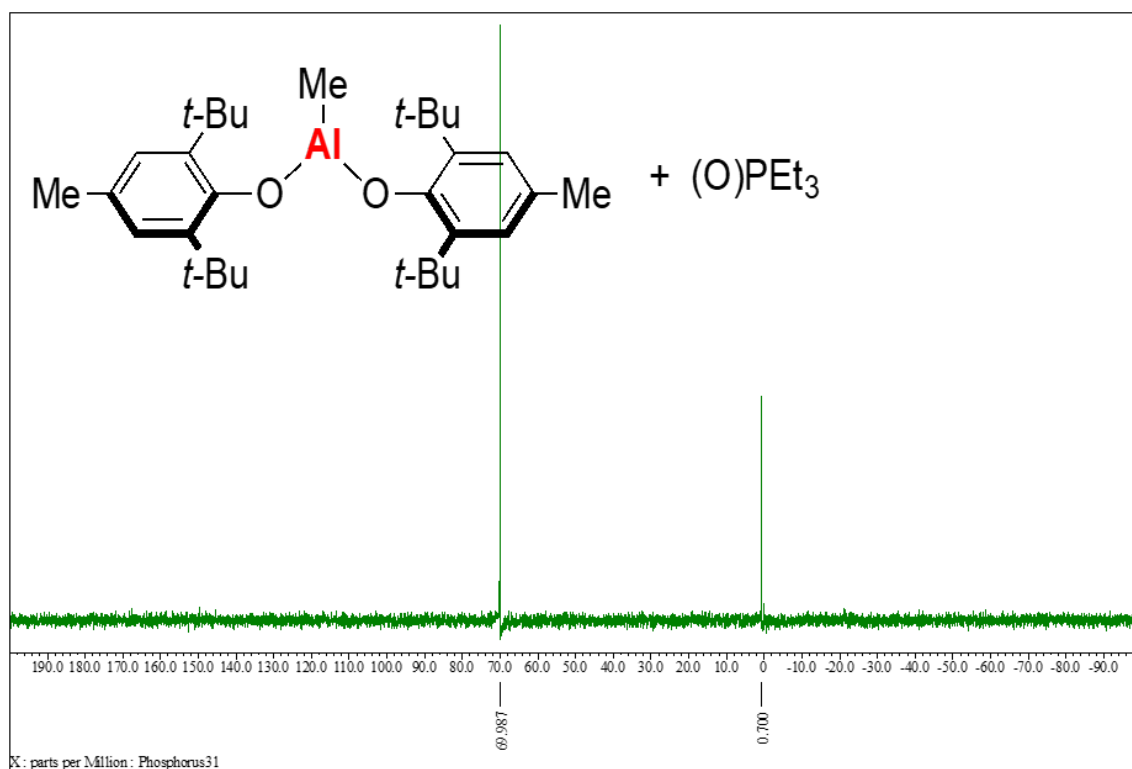Figure S26. A <sup>31</sup>P NMR spectrum of Scheme 2.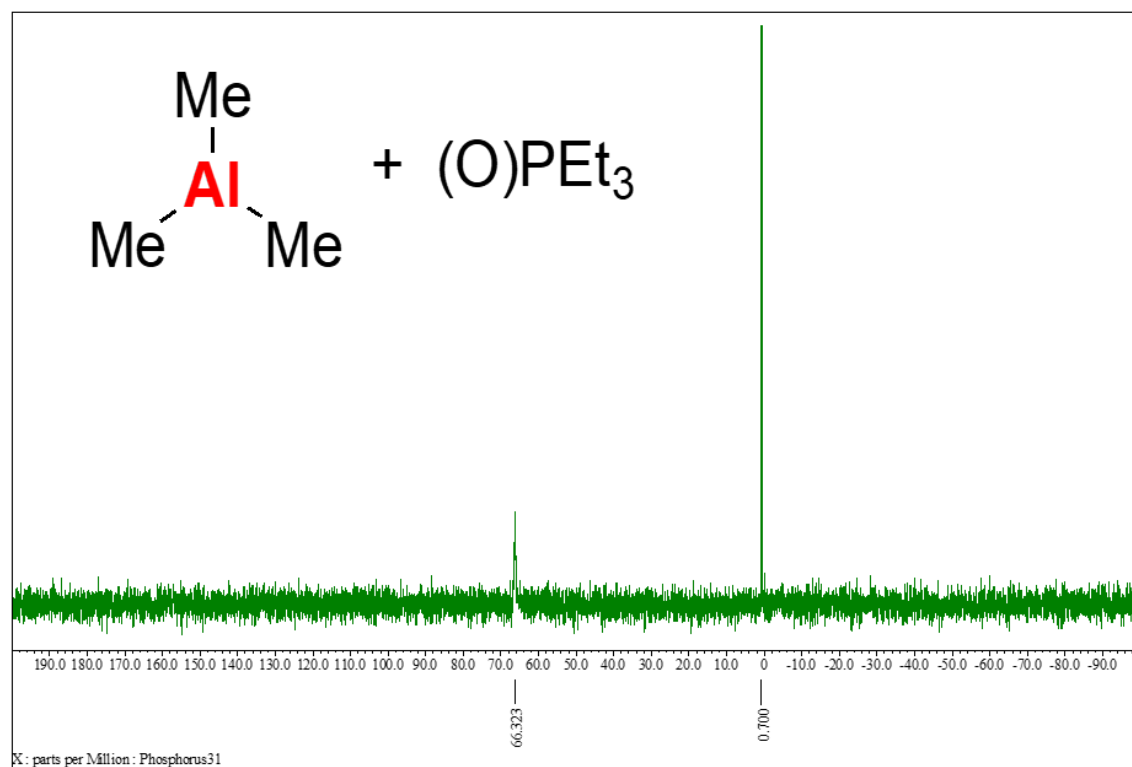Figure S27. A <sup>31</sup>P NMR spectrum of Scheme 2.
