# Supplementary material
Source: MDPI journal article supplement (https://www.mdpi.com/2304-6740/7/12/140)
Supplement: s1 [file s1]

No syntax errors found.  
Please wait while processing ....

[CIF dictionary](#)  
[Interpreting this report](#)

## Datablock: 33\_02\_080b

|                      |                                                |                                 |
|----------------------|------------------------------------------------|---------------------------------|
| Bond precision:      | C-C = 0.0058 Å                                 | Wavelength=0.71075              |
| Cell:                | a=11.5108(13) b=11.7477(12) c=17.714(2)        |                                 |
|                      | alpha=77.954(5) beta=82.044(5) gamma=68.932(4) |                                 |
| Temperature:         | 143 K                                          |                                 |
|                      | Calculated                                     | Reported                        |
| Volume               | 2180.8(4)                                      | 2180.7(4)                       |
| Space group          | P -1                                           | P -1                            |
| Hall group           | -P 1                                           | -P 1                            |
| Moiety formula       | C49 H48 Al Cl2 O2 P2 Rh                        | C49 H48 Al Cl2 O2 P2 Rh         |
| Sum formula          | C49 H48 Al Cl2 O2 P2 Rh                        | C49 H48 Al Cl2 O2 P2 Rh         |
| Mr                   | 931.60                                         | 931.66                          |
| Dx, g cm-3           | 1.419                                          | 1.419                           |
| Z                    | 2                                              | 2                               |
| Mu (mm-1)            | 0.647                                          | 0.646                           |
| F000                 | 960.0                                          | 960.0                           |
| F000'                | 959.16                                         |                                 |
| h,k,lmax             | 13,13,21                                       | 13,13,21                        |
| Nref                 | 7698                                           | 7551                            |
| Tmin,Tmax            | 0.897,0.937                                    | 0.770,0.937                     |
| Tmin'                | 0.890                                          |                                 |
| Correction method=   | # Reported T Limits: Tmin=0.770                |                                 |
| Tmax=0.937 AbsCorr = | MULTI-SCAN                                     |                                 |
| Data completeness=   | 0.981                                          | Theta(max)= 25.030              |
| R(reflections)=      | 0.0400( 6634)                                  | wR2(reflections)= 0.1291( 7551) |
| S =                  | 1.166                                          | Npar= 514                       |

The following ALERTS were generated. Each ALERT has the format

**test-name ALERT alert-type alert-level.**

Click on the hyperlinks for more details of the test.

### ● Alert level C

|                                   |                                              |           |
|-----------------------------------|----------------------------------------------|-----------|
| <a href="#">PLAT220_ALERT_2_C</a> | Non-Solvent Resd 1 C Ueq(max)/Ueq(min) Range | 3.8 Ratio |
| <a href="#">PLAT232_ALERT_2_C</a> | Hirshfeld Test Diff (M-X) Rh1 --P2 .         | 5.3 s.u.  |

### ● Alert level G

|                                   |                                                                                                                                                                                                                                                                                                                                                         |             |
|-----------------------------------|---------------------------------------------------------------------------------------------------------------------------------------------------------------------------------------------------------------------------------------------------------------------------------------------------------------------------------------------------------|-------------|
| <a href="#">CHEMS02_ALERT_1_G</a> | Please check that you have entered the correct<br>_publ_requested_category classification of your compound;<br>FI or CI or EI for inorganic; FM or CM or EM for metal-organic;<br>FO or CO or EO for organic.<br>From the CIF: _publ_requested_category CHOOSE FI FM FO CI CM CO or A<br>From the CIF: _chemical_formula_sum :C49 H48 Al1 Cl2 O2 P2 Rh1 |             |
| <a href="#">PLAT005_ALERT_5_G</a> | No Embedded Refinement Details Found in the CIF                                                                                                                                                                                                                                                                                                         | Please Do ! |
| <a href="#">PLAT794_ALERT_5_G</a> | Tentative Bond Valency for Al1 (III) .                                                                                                                                                                                                                                                                                                                  | 3.00 Info   |
| <a href="#">PLAT882_ALERT_1_G</a> | No Datum for _diffrn_reflns_av_unetI/netI .....                                                                                                                                                                                                                                                                                                         | Please Do ! |

- 0 **ALERT level A** = Most likely a serious problem - resolve or explain  
0 **ALERT level B** = A potentially serious problem, consider carefully  
2 **ALERT level C** = Check. Ensure it is not caused by an omission or oversight  
4 **ALERT level G** = General information/check it is not something unexpected

- 2 ALERT type 1 CIF construction/syntax error, inconsistent or missing data  
2 ALERT type 2 Indicator that the structure model may be wrong or deficient  
0 ALERT type 3 Indicator that the structure quality may be low  
0 ALERT type 4 Improvement, methodology, query or suggestion  
2 ALERT type 5 Informative message, check

It is advisable to attempt to resolve as many as possible of the alerts in all categories. Often the minor alerts point to easily fixed oversights, errors and omissions in your CIF or refinement strategy, so attention to these fine details can be worthwhile. In order to resolve some of the more serious problems it may be necessary to carry out additional measurements or structure refinements. However, the

purpose of your study may justify the reported deviations and the more serious of these should normally be commented upon in the discussion or experimental section of a paper or in the "special\_details" fields of the CIF. checkCIF was carefully designed to identify outliers and unusual parameters, but every test has its limitations and alerts that are not important in a particular case may appear. Conversely, the absence of alerts does not guarantee there are no aspects of the results needing attention. It is up to the individual to critically assess their own results and, if necessary, seek expert advice.

### Publication of your CIF in IUCr journals

A basic structural check has been run on your CIF. These basic checks will be run on all CIFs submitted for publication in IUCr journals (*Acta Crystallographica*, *Journal of Applied Crystallography*, *Journal of Synchrotron Radiation*); however, if you intend to submit to *Acta Crystallographica Section C* or *E* or *IUCrData*, you should make sure that [full publication checks](#) are run on the final version of your CIF prior to submission.

### Publication of your CIF in other journals

Please refer to the *Notes for Authors* of the relevant journal for any special instructions relating to CIF submission.

---

PLATON version of 07/08/2019; check.def file version of 30/07/2019

### Datablock 33\_02\_080b - ellipsoid plot

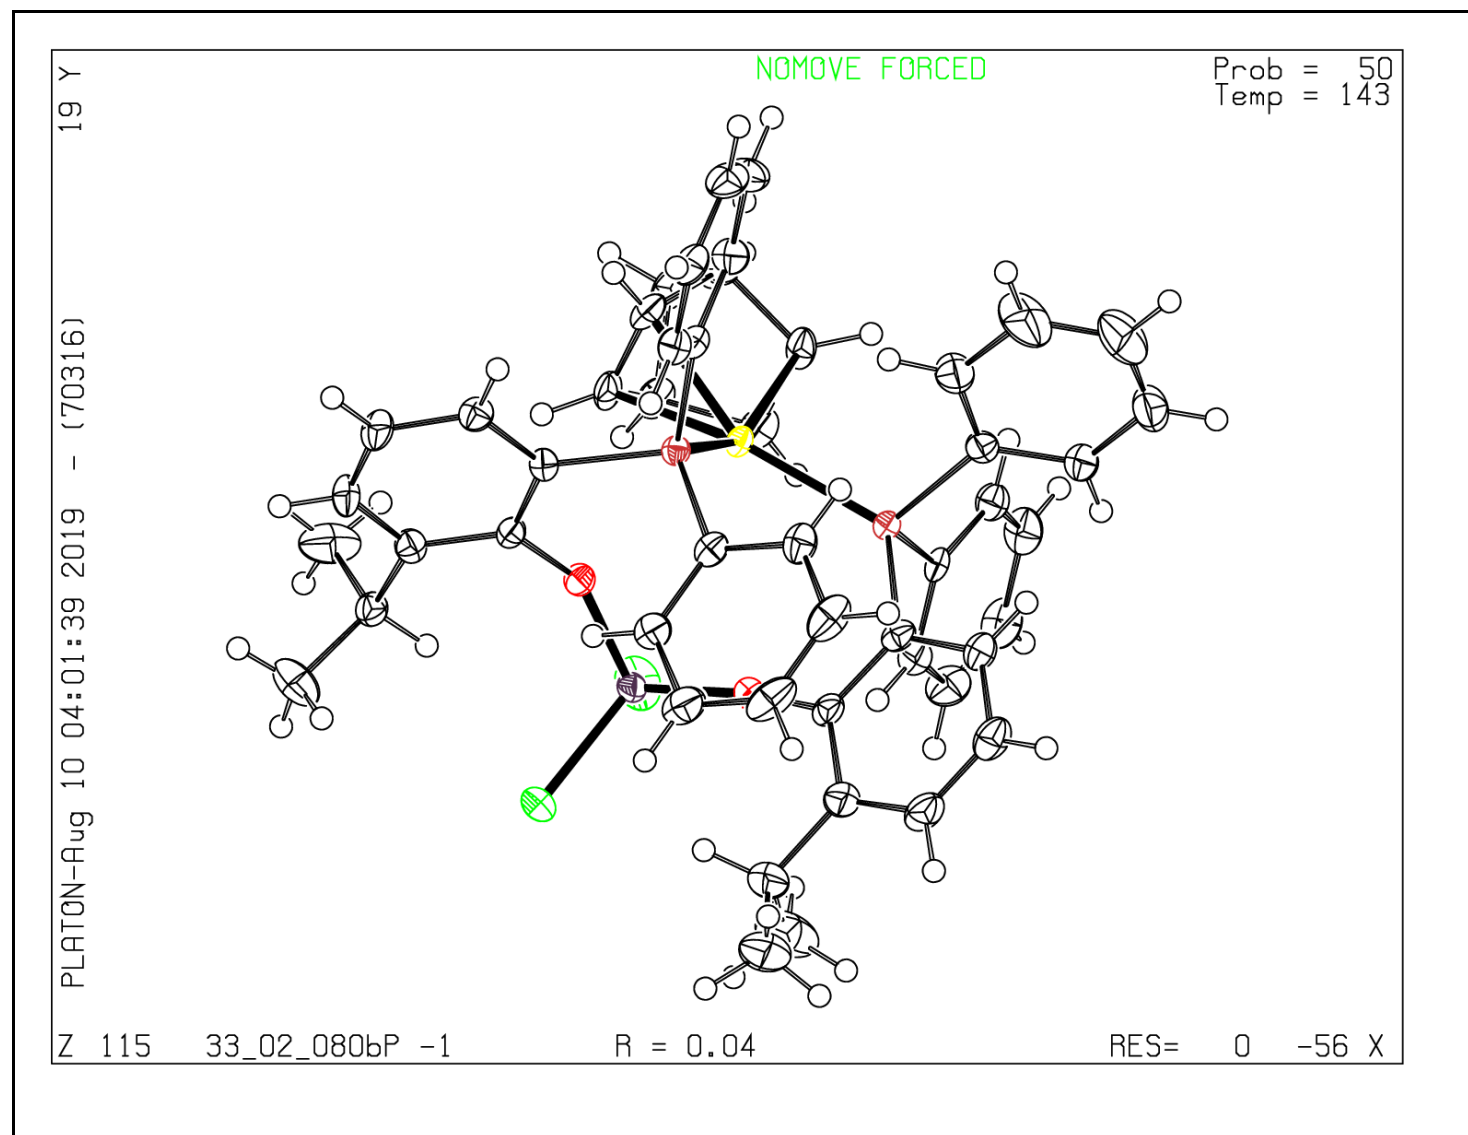

[Download CIF editor \(enCIFer\) from the CCDC](#)  
[Test a new CIF entry](#)
